# Supplementary material
Source: MDPI journal article supplement (https://www.mdpi.com/1424-8247/15/8/1017)
Supplement: s1 [file s1]

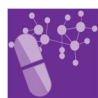

## Research Article

# mRNA-loaded lipid nanoparticles targeting immune cells in the spleen for use as cancer vaccines

Ryoya Shimosakai<sup>1</sup>, Ikramy A. Khalil<sup>1,2,\*</sup>, Seigo Kimura<sup>1</sup>, and Hideyoshi Harashima<sup>1,3,\*</sup>

## Supplementary Table S1. Characterization of different LNPs and RNA-LPX

A. Characterization of DODAP-LNPs prepared with different ratios of DODAP and Cholesterol ratios<sup>1</sup>

| DODAP/Chol | Size (nm) | PDI         | ζ-potential (mV) | EE (%)  |
|------------|-----------|-------------|------------------|---------|
| 28.5/20    | 120±12    | 0.106±0.012 | -5.04±8          | 85.4±16 |
| 38.5/10    | 118±16    | 0.121±0.013 | -4.7±8           | 85.7±20 |
| 48.5/0     | 123±10    | 0.085±0.033 | -10±8            | 78.3±14 |

<sup>1</sup> Values are mean ± SD of at least three different preparationsB. Characterization of DODAP-LNPs prepared with different ratios of DODAP and DOPE ratios<sup>1</sup>

| DODAP/DOPE | Size (nm) | PDI         | ζ-potential (mV) | EE (%)  |
|------------|-----------|-------------|------------------|---------|
| 60/28.5    | 128±15    | 0.115±0.024 | -9.5±6           | 86.9±16 |
| 70/18.5    | 126±25    | 0.138±0.053 | -11.2±7          | 90.7±20 |
| 80/8.5     | 146±6     | 0.101±0.022 | -16.3±10         | 96.6±14 |

<sup>1</sup> Values are mean ± SD of at least three different preparationsC. Characterization of DODAP-LNPs prepared with different amounts of total lipids<sup>1</sup>

| Lipid (nmol) | Size (nm) | PDI         | ζ-potential (mV) | EE (%)  |
|--------------|-----------|-------------|------------------|---------|
| 160          | 132±7     | 0.135±0.046 | -17±2            | 73±1    |
| 240          | 119±10    | 0.145±0.041 | -11.1±10         | 79.8±12 |
| 480          | 129±18    | 0.100±0.052 | -11±2            | 85.5±12 |

<sup>1</sup> Values are mean ± SD of at least three different preparationsD. Characterization of RNA lipoplexes<sup>1</sup>

|         | Size (nm) | PDI        | ζ-potential (mV) |
|---------|-----------|------------|------------------|
| RNA-LPX | 298±44    | 0.335±0.04 | -40.5±14         |

<sup>1</sup> Values are mean ± SD of three different preparations

## Supplementary Figure S1. Flow cytometry analysis of cellular uptake in splenocytes

A.

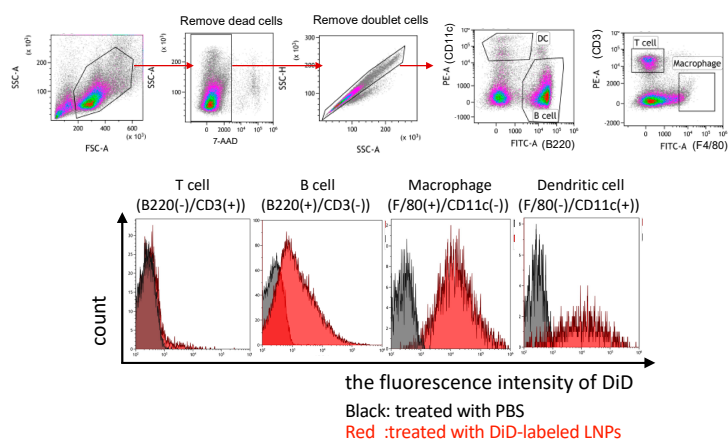

B.

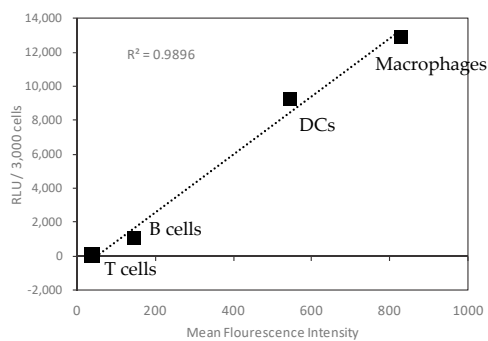

A. Gating strategy and histogram. In the histogram, red: DiD labeled LNP, black: PBS.

B. The correlation between gene expression per cell and cellular uptake per cell.
